# Supplementary material for: The FtcR-Like Protein ActR in Azorhizobium caulinodans ORS571 Is Involved in Bacterial Motility and Symbiosis With the Host Plant
Source: Frontiers journal article supplement (doi:10.3389/fmicb.2021.744268), 2021-11-19
Supplement: Data_Sheet_1.pdf [file Data_Sheet_1.pdf]

# The FtcR-like protein ActR in *Azorhizobium caulinodans* ORS571 is involved in bacterial motility and symbiosis with the host plant

Li Sun<sup>1†</sup>, Dandan Wang<sup>1†</sup>, Zhiqiu Yin<sup>1</sup>, Chengsheng Zhang<sup>2\*</sup>, Amber Bible<sup>3</sup>, Zhihong Xie<sup>1,4\*</sup>

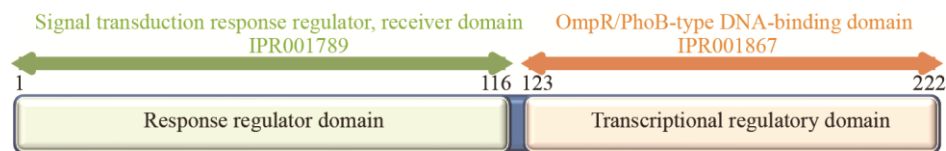

**Supplementary Figure 1.** Schematic representation of the ActR protein in the *A. caulinodans* ORS571 with the location of the domain. The domains predicted by InterPro annotation. IPR001789: Signal transduction response regulator, receiver domain; IPR001867: OmpR/PhoB-type DNA-binding domains are shown as boxes.

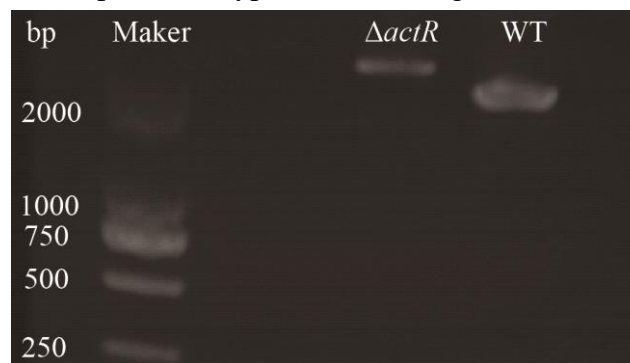

**Supplementary Figure 2.** PCR confirmation of the  $\Delta actR$  mutant strain (Including maker (left), the genomic DNA of  $\Delta actR$  mutant strain (middle), and the genomic DNA of WT (right)).

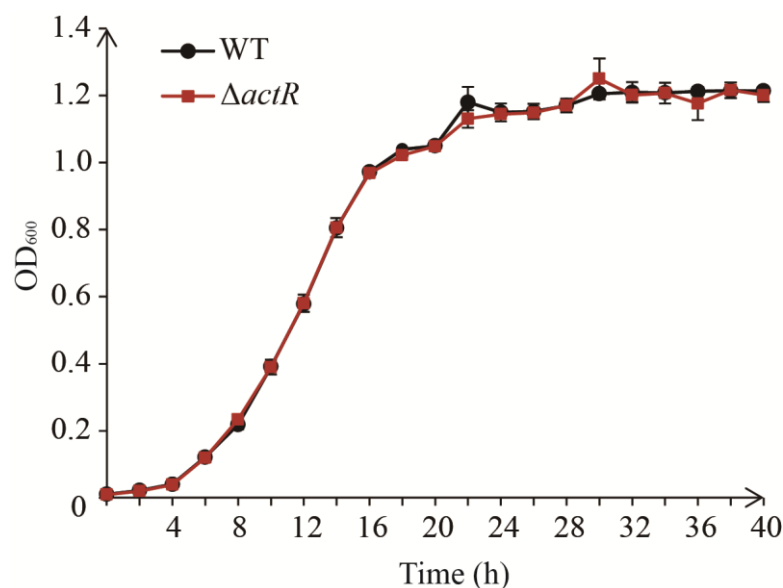

**Supplementary Figure 3.** Growth of the wild-type *A. caulinodans* ORS571 and  $\Delta actR$  mutant strain in TY medium.
